# Supplementary material for: The Na+ leak channel NALCN controls spontaneous activity and mediates synaptic modulation by α2-adrenergic receptors in auditory neurons
Source: eLife. 2024 Jan 10;12:RP89520. doi: 10.7554/eLife.89520 (PMC10945507; doi:10.7554/eLife.89520)
Supplement: Figure 1—source data 1. [file elife-89520-fig1-data1.xlsx]

## Sheet: Fig1
Figure 1
Figure 1B
	WT	NA
c1	30.2	0
c2	16.1333	0
c3	18.3833	0
c4	8.83333	0
c5	15.1667	0
c6	19.0167	0
c7	22.1	0
c8	11.8	0
Figure 1D
	NALCNKO	NA
c1	0	0
c2	0	0
c3	0	0
c4	0	0
c5	0	0
