# Supplementary material for: The Na+ leak channel NALCN controls spontaneous activity and mediates synaptic modulation by α2-adrenergic receptors in auditory neurons
Source: eLife. 2024 Jan 10;12:RP89520. doi: 10.7554/eLife.89520 (PMC10945507; doi:10.7554/eLife.89520)
Supplement: Figure 2—source data 1. [file elife-89520-fig2-data1.xlsx]

## Sheet: fig2
Figure2
Figure2K
Ratio of change in rheobase in NA
	WT	NALCNKO	WT+Idazoxan	WT+hyperpolarization
c1	2.12698	1.16667	1.05556	1.85556
c2	1.65254	1.232	1.25806	2.16393
c3	1.608	1.18852	1.36667	1.98077
c4	1.82639	1.4717	0.677083	2.5641
c5	1.70957	1.21348	0.873016	1.71429
c6	1.78571	1.00922	0.846154	1.36842
c7	2.54348	1.55814	1.52308
c8	1.73196	1.11765	0.634328
c9	2.6087	1.32967
c10	1.90244
c11	1.45631
average	1.90473	1.25412	1.02924	1.94118
se	0.112571	0.0575145	0.115626	0.16594
