# Supplementary material for: The Na+ leak channel NALCN controls spontaneous activity and mediates synaptic modulation by α2-adrenergic receptors in auditory neurons
Source: eLife. 2024 Jan 10;12:RP89520. doi: 10.7554/eLife.89520 (PMC10945507; doi:10.7554/eLife.89520)
Supplement: Figure 3—source data 1. [file elife-89520-fig3-data1.xlsx]

## Sheet: fig3
Figure3
Figure3C
	Amp (pA)
	WT	WT + BaCl2	KO	KO + BaCl2
c1	19.2063	18.4814	-0.536763	-0.702023
c2	10.3625	9.82204	-0.811153	-0.0507654
c3	11.3824	9.30872	0.529509	-0.648804
c4	16.421	15.5598	3.42727	0.110439
c5	14.825	11.575	3.78884	2.70194
c6	20.4267	12.3854	-0.0533732	nan
c7			4.51337	1.08631
c8			4.55062	1.40638
average	15.4373	12.8554	1.92604	0.55764
se	1.6597	1.44461	0.831655	0.468287
