# Supplementary material for: The Na+ leak channel NALCN controls spontaneous activity and mediates synaptic modulation by α2-adrenergic receptors in auditory neurons
Source: eLife. 2024 Jan 10;12:RP89520. doi: 10.7554/eLife.89520 (PMC10945507; doi:10.7554/eLife.89520)
Supplement: Figure 4—source data 1. [file elife-89520-fig4-data1.xlsx]

## Sheet: fig4
Figure4
Figure4C
	Amp (pA)							Figure3D
	WT	WT + BaCl2	KO	KO + BaCl2				WT	NALCNKO
c1	38.87	25.2	8.10305	4.17553				35.1639	48.4697
c2	49.9	28.31	14.6327	1.65879				43.2591	88.6639
c3	42.52	27.5	17.4129	3.82629				35.3246	78.0261
c4	44.1621	40.3335	2.53204	0				8.66942	100
c5	36.726	27.7256	29.9035	7.62455				24.5068	74.5028
c6	32.453	30.2321	4.34209	0.358562				6.84328	91.7422
c7	43.4281	30.7607	13.4186	0.358562				29.1688	97.3279
c8	55.5068	37.1833						33.0112
average	42.9457	30.9057	12.9064	2.57176			Average	26.9934	82.6761
se	2.58233	1.84086	3.5068	1.05696			se	4.60912	6.71059
