# Supplementary material for: The Na+ leak channel NALCN controls spontaneous activity and mediates synaptic modulation by α2-adrenergic receptors in auditory neurons
Source: eLife. 2024 Jan 10;12:RP89520. doi: 10.7554/eLife.89520 (PMC10945507; doi:10.7554/eLife.89520)
Supplement: Figure 5—source data 1. [file elife-89520-fig5-data1.xlsx]

## Sheet: fig5
Figure5
Figure 5B						Figure 5D						Figure 5F
	2 Ca2+	0.1 Ca2+	NA				2 Ca2+	0.1 Ca2+	NA			WT	NALCNKO
c1	0	-160.941	19.4476			c1	0	-19.4755	-10.9893		c1	180.389	8.4862
c2	0	-136.081	14.5876			c2	0	0	35.8069		c2	150.668	35.8069
c3	0	-160.32	-67.3592			c3	0	2.6323	14.8975		c3	92.961	4.42775
c4	0	-176.586	-76.0723			c4	0	-4.15989	29.9346		c4	100.514	12.2652
c5	0	-88.9525	-66.5565			c5	0	-17.22	-8.859		c5	22.396	34.0945
c6	0	-133.601	-84.8996			c6	0	9.536	13.964		c6	48.701	8.361
c7	0	-163.868	-102.071								c7	61.797
c8	0	-125.538	-36.2061			average	0	-4.78119	12.4591		c8	89.3323
c9	0	-73.946	-29.981			se	0	4.66846	7.88039		c9	43.965
c10	0	-105.691	-105.508								c10	0.183
c11	0	-62.967	-31.9105								c11	31.0565
c12	0	-44.6645	-20.9691								c12	23.6955
c13	0	-79.6675	-39.8126								c13	39.8549
c14	0	-43.8534	-21.1939								c14	22.6594
c15	0	-92.2568	-78.1108								c15	14.146
c16	0	-154.201	-119.256								c16	34.945
c17	0	-32.6386	-10.5258								c17	22.1128
c18	0	-101.314	-64.0453								c18	37.2685
average	0	-107.616	-51.1357								average	56.4803	17.2403
se	0	10.802	9.44086								se	11.4472	5.69553
