# Supplementary material for: The Na+ leak channel NALCN controls spontaneous activity and mediates synaptic modulation by α2-adrenergic receptors in auditory neurons
Source: eLife. 2024 Jan 10;12:RP89520. doi: 10.7554/eLife.89520 (PMC10945507; doi:10.7554/eLife.89520)
Supplement: Figure 6—source data 1. [file elife-89520-fig6-data1.xlsx]

## Sheet: fig6
Figure6
Figure 6C						Figure 6D						Figure 6E
	2 Ca2+	0.1 Ca2+	Baclofen				2 Ca2+	0.1 Ca2+	Baclofen			WT	NALCNKO
c1	0	-49.7509	11.5623			c1	0	17.0623	7.51892		c1	61.3132	9.54338
c2	0	-39.058	91.0441			c2	0	3.58592	0.106502		c2	130.102	3.47941
c3	0	-43.6513	25.6139			c3	0	-43.5261	-45.5582		c3	69.2652	2.03215
c4	0	-28.683	4.4207			c4	0	-35.6378	-36.0808		c4	33.1037	0.442955
c5	0	-83.2691	21.1231			c5	0	-9.9766	-22.2059		c5	104.392	12.2293
c6	0	-43.3991	26.1237			c6	0	-18.3909	0.510115		c6	69.5228	18.9011
c7	0	-194.301	-123.103								c7	71.198
c8	0	-118.704	-30.6826			average	0	-14.4805	-15.9516		c8	88.0212
c9	0	-235.246	-66.148			se	0	9.39539	8.94533		c9	169.098
c10	0	-217.696	-117.975								c10	99.721
c11	0	-69.2322	-31.4629								c11	37.7693
c12	0	-231.154	-55.0058								c12	176.148
c13	0	-93.3391	2.9984								c13	96.3375
c14	0	-179.443	-13.348								c14	166.095
c15	0	-139.466	-27.2002								c15	112.265
average	0	-117.76	-18.8026								average	98.9568	7.77138
se	0	19.6032	14.517								se	11.6916	2.89798
