# Supplementary material for: The Na+ leak channel NALCN controls spontaneous activity and mediates synaptic modulation by α2-adrenergic receptors in auditory neurons
Source: eLife. 2024 Jan 10;12:RP89520. doi: 10.7554/eLife.89520 (PMC10945507; doi:10.7554/eLife.89520)
Supplement: Figure 7—source data 1. [file elife-89520-fig7-data1.xlsx]

## Sheet: fig7
Figure7
Figure7B								Figure 7C
	2 Ca2+	0.1 Ca2+	Baclofen	NA					Baclofen	NA	Additional NA block in Baclofen
c1	0	-194.301	-123.103	-109.495				c1	36.6431	38.6209	7.00355
c2	0	-118.704	-30.6826	-19.9536				c2	74.152	82.3327	9.03846
c3	0	-235.246	-66.148	-54.048				c3	71.8813	69.6224	5.14355
c4	0	-217.696	-117.975	-121.414				c4	45.8075	23.7009	-1.57973
c5	0	-69.2322	-31.4629	-32.0541				c5	54.5545	70.3733	-0.853938
c6	0	-231.154	-55.0058	-87.7788				c6	76.2038	45.2967	-14.178
c7	0	-93.3391	2.9984	21.429				c7	103.212	108.188	19.7459
c8	0	-179.443	-13.348	-10.644				c8	92.5614	22.1653	1.50689
c9	0	-139.465	-27.2002	-8.5548				c9	80.4968	45.3037	13.3692
average	0	-164.287	-51.3252	-46.9459				average	70.6125	56.1782	4.35509
se	0	20.4981	14.7307	16.4961				se	7.18281	9.52183	3.25244
