# Supplementary material for: The Na+ leak channel NALCN controls spontaneous activity and mediates synaptic modulation by α2-adrenergic receptors in auditory neurons
Source: eLife. 2024 Jan 10;12:RP89520. doi: 10.7554/eLife.89520 (PMC10945507; doi:10.7554/eLife.89520)
Supplement: Figure 8—source data 1. [file elife-89520-fig8-data1.xlsx]

## Sheet: Sheet1
Figure8
Figure8E
	WT	NALCNKO
c1	7.00209	-14.4828
c2	74.4134	3.64158
c3	1.67718	22.3276
c4	49.1588	-15.6156
c5	41.2221	-12.7945
c6	58.481	4.15868
c7	11.2692	-9.16205
c8	80.8797	-8.25217
average	40.5129	-3.77241
se	10.9081	4.59924
